# Supplementary material
Source: publisher figshare collection journal article supplement (https://tandf.figshare.com/ndownloader/files/36011572)
Supplement: Supplementary file 1 [file 36011572]

# Table S1. Samples and sequences included in this study focusing on New Caledonian *Litsea* and *Adenodaphne*. Locality is given for all New Caledonian samples. Abbreviations for collectors are as follows: CG, C Grignon; CECG, CEC Gemmill; CXQ, Xiu-Qin Ci; IZ, IA Fujridiyanto; JM, J Munzinger; vdW, H van der Werff; YP, Y Pillon.

| **Species** | **Collector** | **Country** | **Locality** | **GenBank Accession** | **Source** |
| --- | --- | --- | --- | --- | --- |
| *Actinodaphne cupularis* | Wuyishan Ex 1693 | China |  | AY817113 | (Li J et al. 2008) |
| *Actinodaphne forrestii* | Li HW2 | China |  | AY265399 | (Li J et al. 2008) |
| *Actinodaphne glomerata* | IZ802 | Malaysia |  | AB260849 | (Fijridiyanto and Murakami 2009a) |
| *Actinodaphne henryi* | Li J2002032 | China |  | AY817120 | (Li J et al. 2008) |
| *Actinodaphne nitida* | JM7018 | Papua New Guinea | Mt Wilhelm | ON532843 | This study |
| *Actinodaphne sesquipedalis* | Saw Leng Guan s.n. | Malaysia |  | AF272247 | (Chanderbali et al. 2001) |
| *Adenodaphne spathulata* | JM6130 | New Caledonia | Ouaième | ON532846 | This study |
| *Adenodaphne spathulata* | JM7084 | New Caledonia | Tchingou | ON532847 | This study |
| *Adenodaphne triplinervia* | JM7559 | New Caledonia | Katépahié | ON532848 | This study |
| *Adenodaphne triplinervia* | JM7950 | New Caledonia | Koniambo | ON532849 | This study |
| *Adenodaphne triplinervia* | JM7952 | New Caledonia | Koniambo | ON532850 | This study |
| *Adenodaphne uniflora* | CG95 | New Caledonia | Forêt de Sailles | ON532851 | This study |
| *Adenodaphne uniflora* | JM4410 | New Caledonia | Tontouta | ON532852 | This study |
| *Adenodaphne uniflora* | JM7821 | New Caledonia | Couvelée | ON532853 | This study |
| *Adenodaphne uniflora* | vdW15895 | New Caledonia | Mt Mou | AF272248 | (Chanderbali et al. 2001) |
| *Adenodaphne_macrophylla* | JM4546 | New Caledonia | Koniambo | ON532844 | This study |
| *Adenodaphne_macrophylla* | JM5803 | New Caledonia | Paagoumène | ON532845 | This study |
| *Cinnamomum pittosporoides* | Li & Rohwer 2010-11 | China |  | MF110055 | (Rohde et al. 2017) |
| *Dodecadenia grandiflora* (*syn Litsea grandiflora*) | Wu et al 75-1048 | Tibet |  | AY265397 | (Li J et al. 2008) |
| *Iteadaphne* (syn *Lindera*) | vdW14360 | Vietnam |  | AF272275 | (Chanderbali et al. 2001) |
| *Iteadaphne caudata* (syn *Lindera caudata*) | Li HW27 | China |  | AY265396 | (Li J et al. 2008) |
| *Laurus nobilis* | Huang & Ding 01 | China |  | KU139906 | (Jian-Feng et al. 2016) |
| *Lindera communis* | Li HW4 | China |  | AY265409 | (Li J et al. 2008) |
| *Lindera fruticosa* | CXQ0330 | China |  | KX546432 | (Liu et al. 2017) |
| *Lindera metcalfiana* | Li HW8 | China |  | AY265408 | (Li J et al. 2008) |
| *Lindera obtusiloba* | Sino-Amer Ex1308 | China |  | AY265411 | (Li J et al. 2008) |
| *Lindera reflexa* | Nei & Lai 3768 | China |  | AY265407 | (Li J et al. 2008) |
| *Litsea calicaris* | CECG1050 | New Zealand | Waikato (cultivated) | ON532854 | This study |
| *Litsea deplanchei* | JM5766 | New Caledonia | Boulinda | ON532855 | This study |
| *Litsea deplanchei* | JM5785 | New Caledonia | Creek Pandanus | ON532856 | This study |
| *Litsea deplanchei* | JM7838 | New Caledonia | Sarraméa | ON532857 | This study |
| *Litsea dilleniifolia* | Li HW19 | China |  | AY265405 | (Li J et al. 2008) |
| *Litsea elongata* | Li J2002146 | China |  | AY265406 | (Li J et al. 2008) |
| *Litsea firma* | IZ835 | Borneo |  | AB260868 | (Fijridiyanto and Murakami 2009a) |
| *Litsea glutinosa* **TYPE** | Li HW21 | China |  | AY265403 | (Li J et al. 2008) |
| *Litsea grandis* | IZ2042 | Borneo |  | AB260872 | (Fijridiyanto and Murakami 2009a) |
| *Litsea humboldtiana* | JM7070 | New Caledonia | Tiébaghi | ON532858 | This study |
| *Litsea humboldtiana* | JM7451 | New Caledonia | Chagrin | ON532859 | This study |
| *Litsea kauloensis* | Molino3124 | Papua New Guinea | Mt Wilhelm | ON532862 | This study |
| *Litsea lecardii* | JM6317 | New Caledonia | Dawenia | ON532863 | This study |
| *Litsea ledermanii* | JM7005 | Papua New Guinea | Mt Wilhelm | ON532864 | This study |
| *Litsea longepedunculata* | JM7290 | New Caledonia | Tiébaghi | ON532865 | This study |
| *Litsea mappacea* | IZ8710 | Indonesia |  | AB260876 | (Fijridiyanto and Murakami 2009a) |
| *Litsea miana* | JM7622 | New Caledonia | Bwa Bwi | ON532866 | This study |
| *Litsea monopetala* | Li J2002108 | China |  | DQ120602 | (Li J et al. 2008) |
| *Litsea neocaledonica* | JM4850 | New Caledonia | Dogny | ON532867 | This study |
| *Litsea neocaledonica* | JM8064 | New Caledonia | Nekando | ON532868 | This study |
| *Litsea ovalis* | JM7557 | New Caledonia | Katépahié | ON532869 | This study |
| *Litsea ovalis* | JM7949 | New Caledonia | Koniambo | ON532870 | This study |
| *Litsea pentaflora* | JM6722 | New Caledonia | Ouamenie | ON532871 | This study |
| *Litsea resinosa* | IZ839 | Indonesia |  | AB260879 | (Fijridiyanto and Murakami 2009a) |
| *Litsea ripidion* | Pouteau5 | New Caledonia | Lembi, Mouirange | ON532872 | This study |
| *Litsea samoensis* | JM5528 | [Wallis et Futuna](https://science.mnhn.fr/all/list?country=Wallis%20et%20Futuna) | Alofi | ON532873 | This study |
| *Litsea* sp. | JM6909 | Papua New Guinea | Mt Wilhelm | ON532860 | This study |
| *Litsea* sp. | JM6980 | Papua New Guinea | Mt Wilhelm | ON532861 | This study |
| *Litsea* sp. | JM8110 | New Caledonia | Ouaième | ON532874 | This study |
| *Litsea* sp. | JM8114 | New Caledonia | Ouaième | ON532875 | This study |
| *Litsea stenophylla* | CG173 | New Caledonia | Mt Mou | ON532876 | This study |
| *Litsea stenophylla* | JM7817 | New Caledonia | Couvelée | ON532877 | This study |
| *Litsea tomentosa* | JM6974 | Papua New Guinea | Mt Wilhelm | ON532878 | This study |
| *Litsea triflora* | JM7198 | New Caledonia | Dzumac | ON532880 | This study |
| *Litsea triflora* | JM7632 | New Caledonia | Bwa Bwi | ON532881 | This study |
| *Litsea triflora* | JM7790 | New Caledonia | Koniambo | ON532882 | This study |
| *Litsea triflora* | JM7909 | New Caledonia | Dzumac | ON532883 | This study |
| *Litsea triflora* | JM8068 | New Caledonia | Nekando | ON532884 | This study |
| *Litsea trifora* | JM5764 | New Caledonia | Mt Do | ON532879 | This study |
| *Neolitsea aciculata* | IZ1001 | Japan |  | AB260884 | (Fijridiyanto and Murakami 2009a) |
| *Neolitsea cassia* | IZ831 | Indonesia |  | AB260885 | (Fijridiyanto and Murakami 2009a) |
| *Neolitsea confertifolia* | Gao XP53971 | China |  | AY265400 | (Li J et al. 2004) |
| *Neolitsea levinei* | Li HW29 | China |  | AY265401 | (Li J et al. 2004) |
| *Neolitsea lunglingensis* | 300147 | China |  | JF977153 | (China Plant Bol Group et al. 2011) |
| *Neolitsea sericea* | Yasuda1355 | Japan |  | AF272296 | (Chanderbali et al. 2001) |
| *Parasassafras confertiflora* | Qian YY682 | China |  | AY265395 | (Li J et al. 2004) |
| *Sassafras tzumu* | Li HW15 | China |  | AY265391 | (Li J et al. 2004) |
| *Sinosassafras flavinervia* | Yang ZH101437 | China |  | AY265394 | (Li J et al. 2004) |
| *Umbellularia californica* | vdW s.n. | North America |  | AY265393 | (Li J et al. 2004) |
